# Supplementary material for: Tazarotene-Induced Gene 1 (TIG1) Interacts with Serine Protease Inhibitor Kazal-Type 2 (SPINK2) to Inhibit Cellular Invasion of Testicular Carcinoma Cells
Source: Hindawi journal article supplement (doi:10.1155/2019/6171065), 2019-11-25
Supplement: f1 [file 6171065.f1.pdf]

Supplementary Table 1. TIG1 and SPINK2 suppress NT2/D1 cell migration and invasion

|                |             | Cell number    | <i>p</i> -value          |
|----------------|-------------|----------------|--------------------------|
| Migrated cells | Ctrl        | 1892 ±134.5    |                          |
|                | TIG1        | 824.7 ± 106.5  | 1.64877E-05 <sup>a</sup> |
|                | SPINK2      | 1080.7 ±220.9  | 0.00015 <sup>a</sup>     |
|                | TIG1+SPINK2 | 351.3 ±110.5   | 0.00019 <sup>b</sup>     |
| Invaded cells  | Ctrl        | 1110.3 ± 143.3 |                          |
|                | TIG1        | 189.3 ± 62.7   | 0.00116 <sup>a</sup>     |
|                | SPINK2      | 341.7 ± 104.5  | 0.00025 <sup>a</sup>     |
|                | TIG1+SPINK2 | 41.7 ± 18.6    | 0.01724 <sup>b</sup>     |

<sup>a</sup>*p* <0.05 cells transfected with TIG1 or SPINK2 plasmid compared with cells transfected with empty vector (Ctrl group). <sup>b</sup>*p* <0.05 cells cotransfected with TIG1 and SPINK2 plasmids compared with cells transfected with TIG1 plasmid.

Supplementary Table 2. Effect of TIG1 and SPINK2 on uPA activity in NT2/D1 cells

|             | uPA activity (unit/ $\mu$ g protein) | <i>p</i> -value      |
|-------------|--------------------------------------|----------------------|
| Ctrl        | 0.64 $\pm$ 0.06                      |                      |
| TIG1        | 0.43 $\pm$ 0.01                      | 0.00063 <sup>a</sup> |
| SPINK2      | 0.52 $\pm$ 0.02                      | 0.00028 <sup>a</sup> |
| TIG1+SPINK2 | 0.27 $\pm$ 0.07                      | 0.00284 <sup>b</sup> |

<sup>a</sup>*p* < 0.05 cells transfected with TIG1 or SPINK2 plasmid compared with cells transfected with empty vector (Ctrl group). <sup>b</sup>*p* < 0.05 cells cotransfected with TIG1 and SPINK2 plasmids compared with cells transfected with TIG1 plasmid.

Supplementary Table 3. Effect of SPINK2 siRNA on TIG1-regulated uPA activity in NT2/D1 cells.

|               | uPA activity (unit/ $\mu$ g protein) | <i>p</i> -value          |
|---------------|--------------------------------------|--------------------------|
| Ctrl + NCI    | 0.71 $\pm$ 0.09                      |                          |
| TIG1 + NCI    | 0.46 $\pm$ 0.03                      | 0.00096 <sup>a</sup>     |
| TIG1+ SPINK2i | 0.65 $\pm$ 0.02                      | 1.99263E-05 <sup>b</sup> |

<sup>a</sup> *p* < 0.05 cells transfected with TIG1 plasmid and control (NCI) siRNA compared with cells transfected with empty vector and NCI. <sup>b</sup> *p* < 0.05 cells cotransfected with TIG1 plasmid and SPINK2 siRNA compared with cells transfected with TIG1 plasmid and NCI.

Supplementary Table 4. SPINK2 siRNA alleviates TIG-regulated cell migration and invasion.

|                |                | Cell number    | <i>p</i> -value          |
|----------------|----------------|----------------|--------------------------|
| Migrated cells | Ctrl + NCi     | 1450.7 ± 169.2 |                          |
|                | TIG1 + NCi     | 651 ± 114      | 0.00014 <sup>a</sup>     |
|                | TIG1 + SPINK2i | 1060 ± 88.4    | 5.24801E-05 <sup>b</sup> |
| Invaded cells  | Ctrl + NCi     | 1110.3 ± 143.3 |                          |
|                | TIG1 + NCi     | 189.3 ± 62.7   | 0.00225 <sup>a</sup>     |
|                | TIG1 + SPINK2i | 341.7 ± 104.5  | 0.00026 <sup>b</sup>     |

<sup>a</sup>*p* < 0.05 cells transfected with TIG1 plasmid and NCi compared with cells transfected with empty vector and NCi. <sup>b</sup>*p* < 0.05 cells cotransfected with TIG1 plasmid and SPINK2 siRNA compared with cells transfected with TIG1 plasmid and NCi.
